# Supplementary material for: MoOx-decorated Ru/TiO2 with a monomeric structure boosts the selective one-pot conversion of levulinic acid to 1,4-pentanediol
Source: Royal Society of Chemistry journal article supplement (doi:10.1039/d3cy00544e), 2023-01-01
Supplement: d3cy00544e1.pdf [file d3cy00544e1.pdf]

## Supplementary information for

# MoO<sub>x</sub> decorated-Ru/TiO<sub>2</sub> with monomeric structure boosts the selective one-pot conversion of levulinic acid to 1,4-pentanediol

Rodiansono,<sup>a,b\*</sup> Atina Sabila Azzahra,<sup>a,b</sup> Heny Puspita Dewi,<sup>a</sup> Indri Badria Adilina,<sup>c</sup> and Kiky Corneliasari Sembiring<sup>c</sup>

<sup>a</sup> Department of Chemistry, Faculty of Mathematics and Natural Sciences, Lambung Mangkurat University, Jl. A. Yani Km 36.0 Banjarbaru South Kalimantan, Indonesia.

<sup>b</sup> Inorganic Materials & Catalysis (IMCat) Lab and Catalysis for Sustainable Energy and Environment (CATSuRe), Lambung Mangkurat University.

<sup>c</sup> Research Centre for Advanced Chemistry, BRIN, Puspiptek Serpong.

Corresponding author, e-mail: [rodiansono@ulm.ac.id](mailto:rodiansono@ulm.ac.id); Tel./Fax.: +625114773112

### Contents:

- 1) Total acidity of typical Ru and Ru-MoO<sub>x</sub>/TiO<sub>2</sub> catalysts (**Table S1**).
- 2) XRD patterns of Ru-MoO<sub>x</sub>/TiO<sub>2</sub> (Mo = 0.47 wt%; Mo/Ru = 1:10.5) after reduction with H<sub>2</sub> at (a) 400 °C and (b) 500 °C and 600 °C for 1.5 h (Fig. S1).
- 3) (a) Kinetics profiles and (b) Arrhenius plot of LA hydroconversion GVL and 1,4-PeD over Ru-(0.47)MoO<sub>x</sub>/TiO<sub>2</sub> catalyst (Fig. S2).
- 4) (a) Kinetics profiles and (b) Arrhenius plot of LA hydroconversion GVL and 1,4-PeD over Ru (5 wt%)/TiO<sub>2</sub> catalyst (Fig. S3).
- 5) NH<sub>3</sub>-TPD profiles of Ru-(y)MoO<sub>x</sub>/TiO<sub>2</sub> and deconvoluted NH<sub>3</sub>-TPD spectra of Ru-(0.24) MoO<sub>x</sub>/TiO<sub>2</sub> (Mo = 0.24 wt%; Mo/Ru = 1:19.5), Ru-(0.47) MoO<sub>x</sub>/TiO<sub>2</sub> (Mo = 0.47 wt%; Mo/Ru = 1:10.5), and Ru-(0.91) MoO<sub>x</sub>/TiO<sub>2</sub> (Mo = 0.90 wt%; Mo/Ru = 1:5.3) catalysts (**Fig. S4**).
- 6) Pyridine-adsorption profiles of (a) Ru-(5 wt%)/TiO<sub>2</sub>, (b) Ru-(0.47) MoO<sub>x</sub>/TiO<sub>2</sub> (Mo = 0.47 wt%; Mo/Ru = 1:10.5), and (c) Ru-(0.91) MoO<sub>x</sub>/TiO<sub>2</sub> (Mo = 0.90 wt%; Mo/Ru = 1:5.3) catalysts (**Fig. S5**).
- 7) XRD patterns of (a) fresh and (b) recovered Ru-(0.47)MoO<sub>x</sub>/TiO<sub>2</sub> after the second reaction run (Fig. S6).

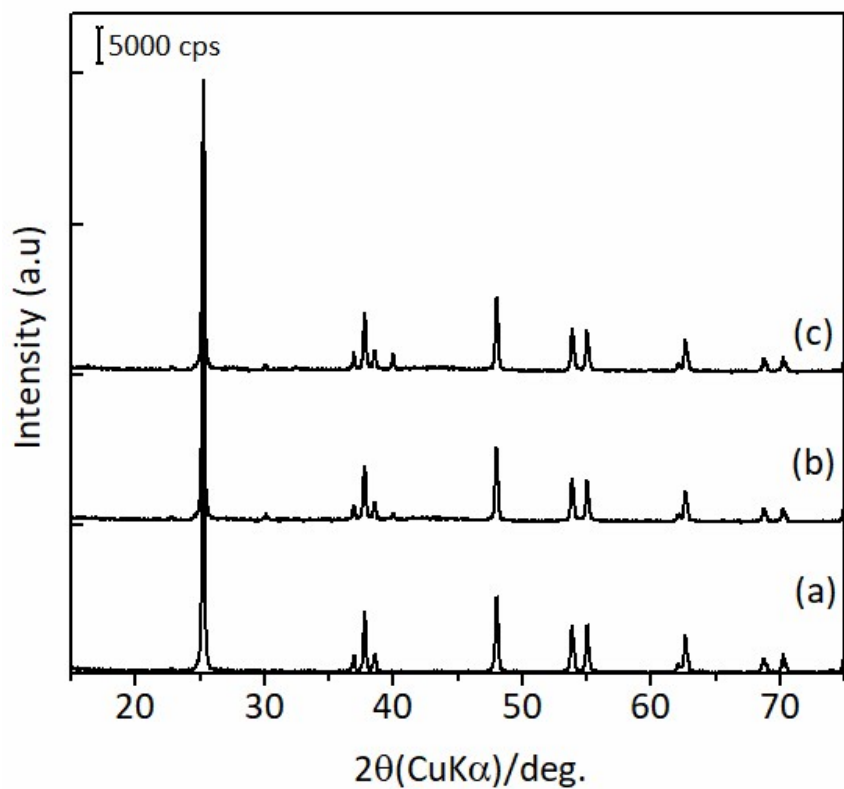

**Fig. S1** XRD patterns of Ru-MoO<sub>x</sub>/TiO<sub>2</sub> (Mo = 0.47 wt%; Mo/Ru = 1:10.5) after reduction with H<sub>2</sub> at (a) 400 °C and (b) 500 °C and (c) 600 °C for 1.5 h.

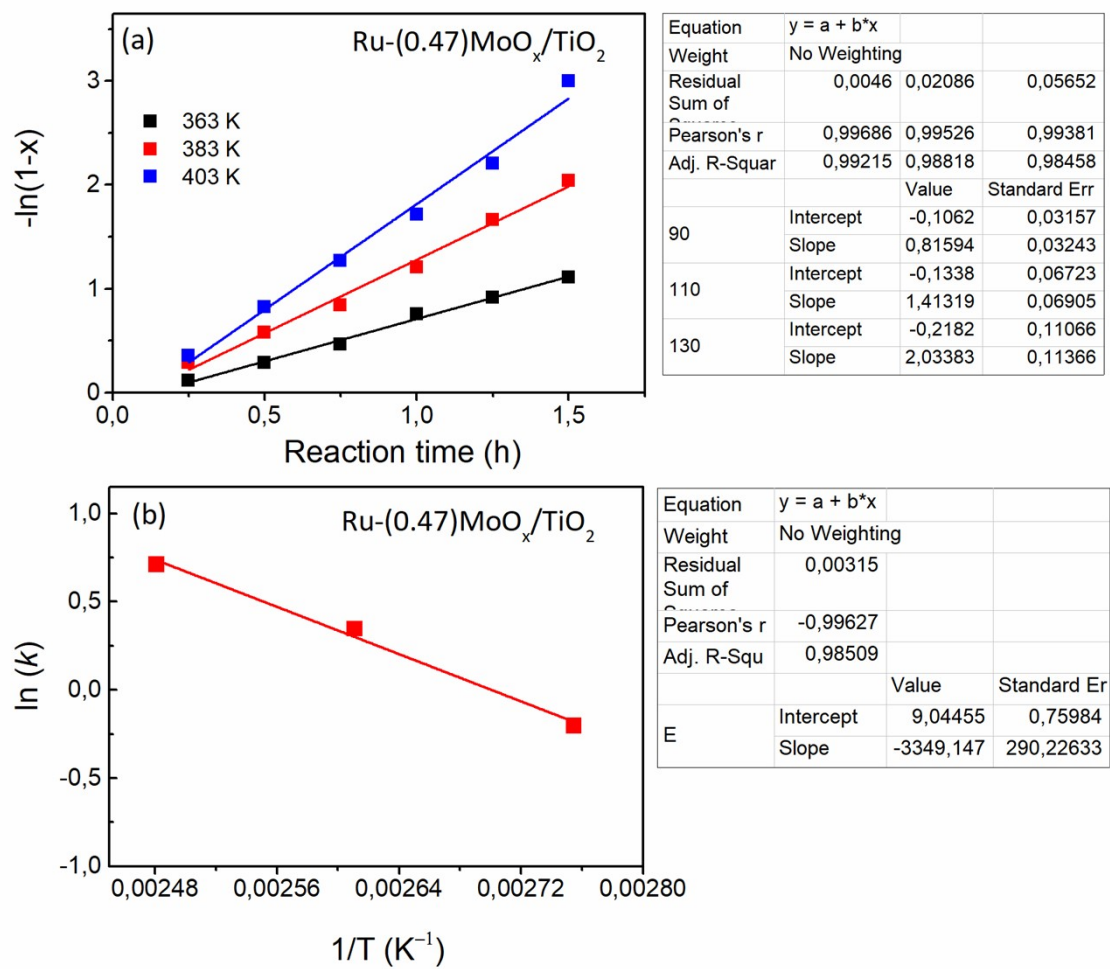

**Fig. S2** (a) Kinetics profiles and (b) Arrhenius plot of LA hydroconversion to 1,4-PeD over Ru-(0.47)MoO<sub>x</sub>/TiO<sub>2</sub> catalyst.

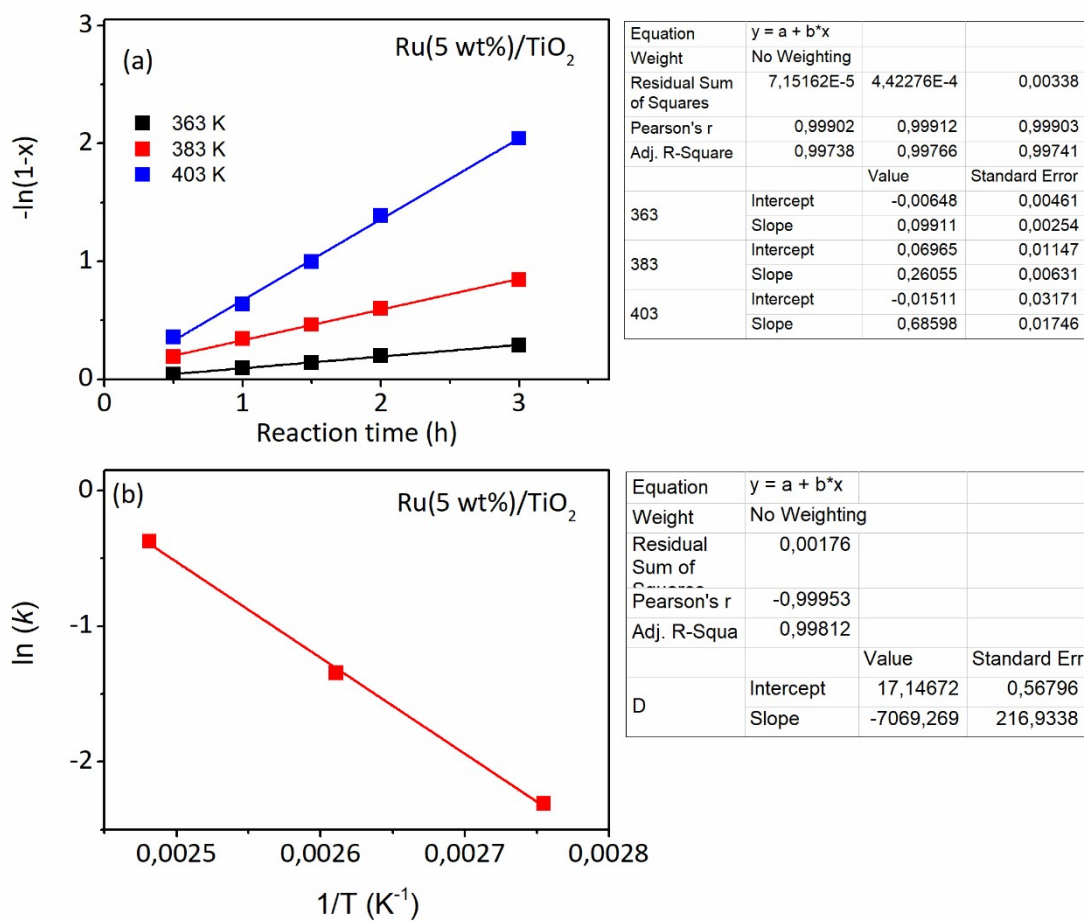

**Fig. S3** (a) Kinetics profiles and (b) Arrhenius plot of LA hydroconversion to 1,4-PeD over Ru (5 wt%)/TiO<sub>2</sub> catalyst.

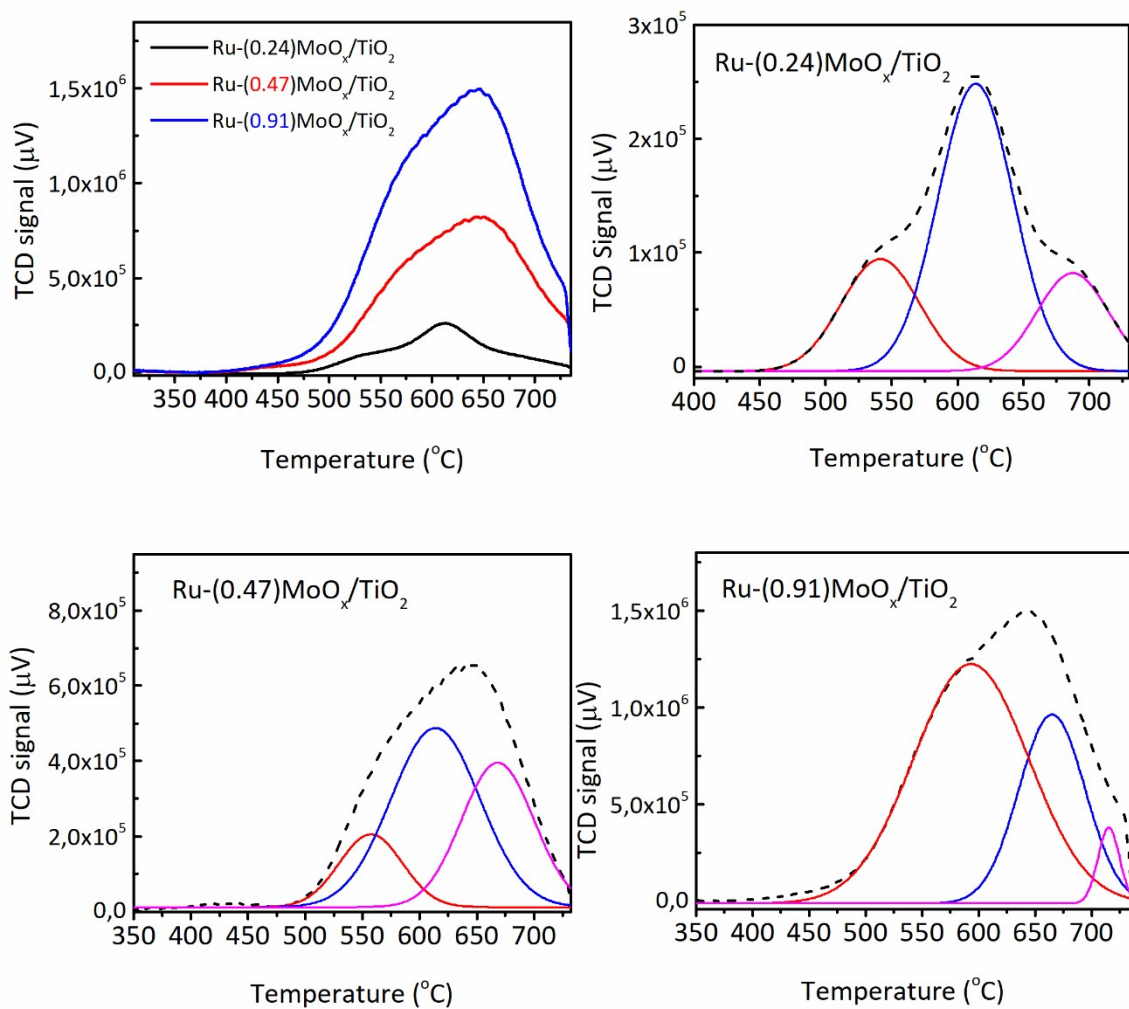

**Fig. S4** NH<sub>3</sub>-TPD profiles of Ru-(y)MoO<sub>x</sub>/TiO<sub>2</sub> and deconvoluted NH<sub>3</sub>-TPD spectra of Ru-(0.24) MoO<sub>x</sub>/TiO<sub>2</sub> (Mo = 0.24 wt%; Mo/Ru = 1:19.5), Ru-(0.47) MoO<sub>x</sub>/TiO<sub>2</sub> (Mo = 0.47 wt%; Mo/Ru = 1:10.5), and Ru-(0.91) MoO<sub>x</sub>/TiO<sub>2</sub> (Mo = 0.90 wt%; Mo/Ru = 1:5.3) catalysts.

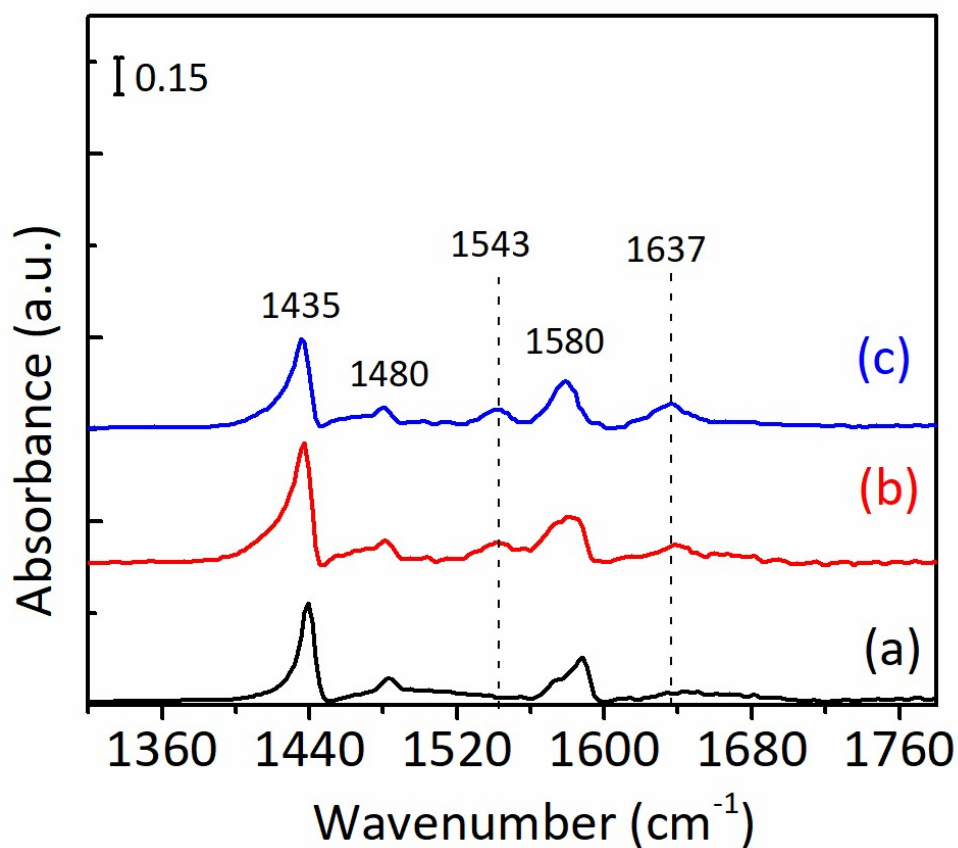

**Fig. S5** Pyridine-adsorption profiles of (a) Ru-(5 wt%)/TiO<sub>2</sub>, (b) Ru-(0.47) MoO<sub>x</sub>/TiO<sub>2</sub> (Mo = 0.47 wt%; Mo/Ru = 1:10.5), and (c) Ru-(0.91) MoO<sub>x</sub>/TiO<sub>2</sub> (Mo = 0.90 wt%; Mo/Ru = 1:5.3) catalysts.

**Table S1.** Total acidity of typical Ru and Ru-MoO<sub>x</sub>/TiO<sub>2</sub> catalysts

| Entry | Catalyst                                    | Total surface acidity                                                        |                                                                      |
|-------|---------------------------------------------|------------------------------------------------------------------------------|----------------------------------------------------------------------|
|       |                                             | NH <sub>3</sub> -TPD <sup>a</sup><br>(μmol NH <sub>3</sub> g <sup>-1</sup> ) | Pyridine-adsorption <sup>b</sup><br>(μmol Pyridine g <sup>-1</sup> ) |
| 1     | Ru (5 wt%)/TiO <sub>2</sub>                 | Nd                                                                           | 0.49                                                                 |
| 2     | Ru-(0.47)MoO <sub>x</sub> /TiO <sub>2</sub> | 201                                                                          | 2.53                                                                 |
| 3     | Ru-(0.91)MoO <sub>x</sub> /TiO <sub>2</sub> | 321                                                                          | 24.21                                                                |

<sup>a</sup> The acidity was measured by using NH<sub>3</sub>-TPD. <sup>b</sup> The acidity of the catalysts was tested by the gravimetric method using pyridine gas as a basic adsorbate.

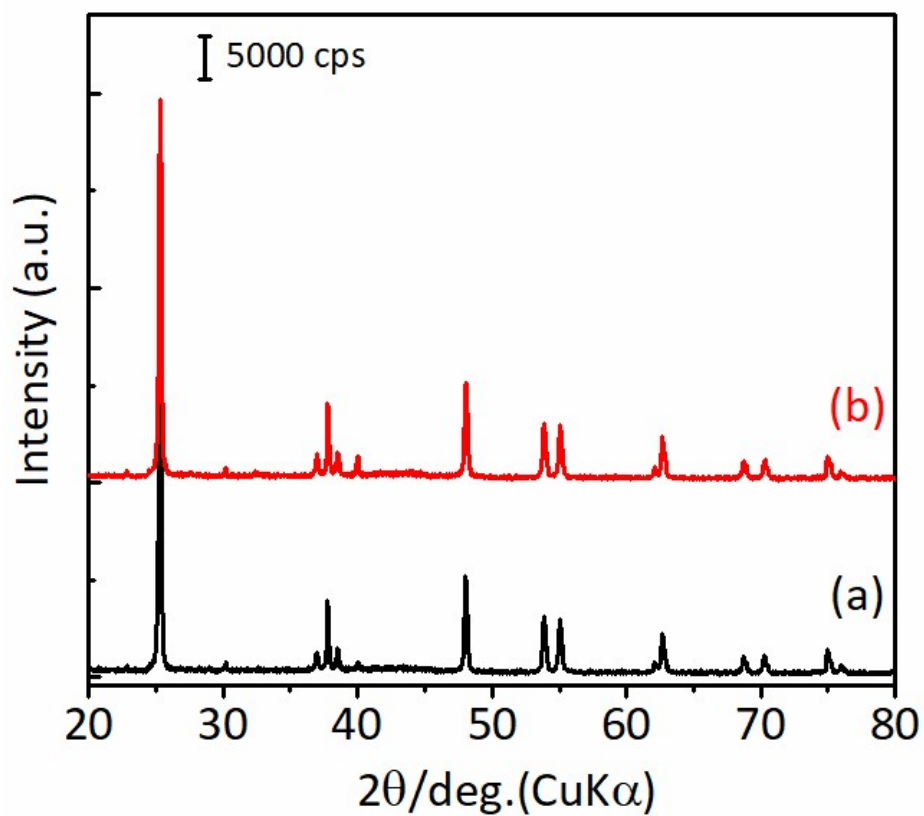

Fig. S6 XRD patterns of (a) fresh and (b) recovered Ru-(0.47)MoO<sub>x</sub>/TiO<sub>2</sub> after the second reaction run.
